# Supplementary material for: Retinoic Acid Metabolic Genes, Meiosis, and Gonadal Sex Differentiation in Zebrafish
Source: PubMed Central journal article supplement (PMC3769385; doi:10.1371/journal.pone.0073951), 2013-09-10

**Additional Figure S1.** Cyp26 orthologies between zebrafish and medaka were supported by clusters of conserved synteny, which extends conclusions from zebrafish to other teleost models. A: *cyp26a1* in *Dre12* and *Ola19*; B: *cyp26b1* in *Dre7* and *Ola18*; and *cyp26c1* in *Dre17* and *Ola15*. Cyp26 orthologs have been labeled with larger fonts, and names of gene neighbors can be surfed in the high-resolution pdf electronic file.

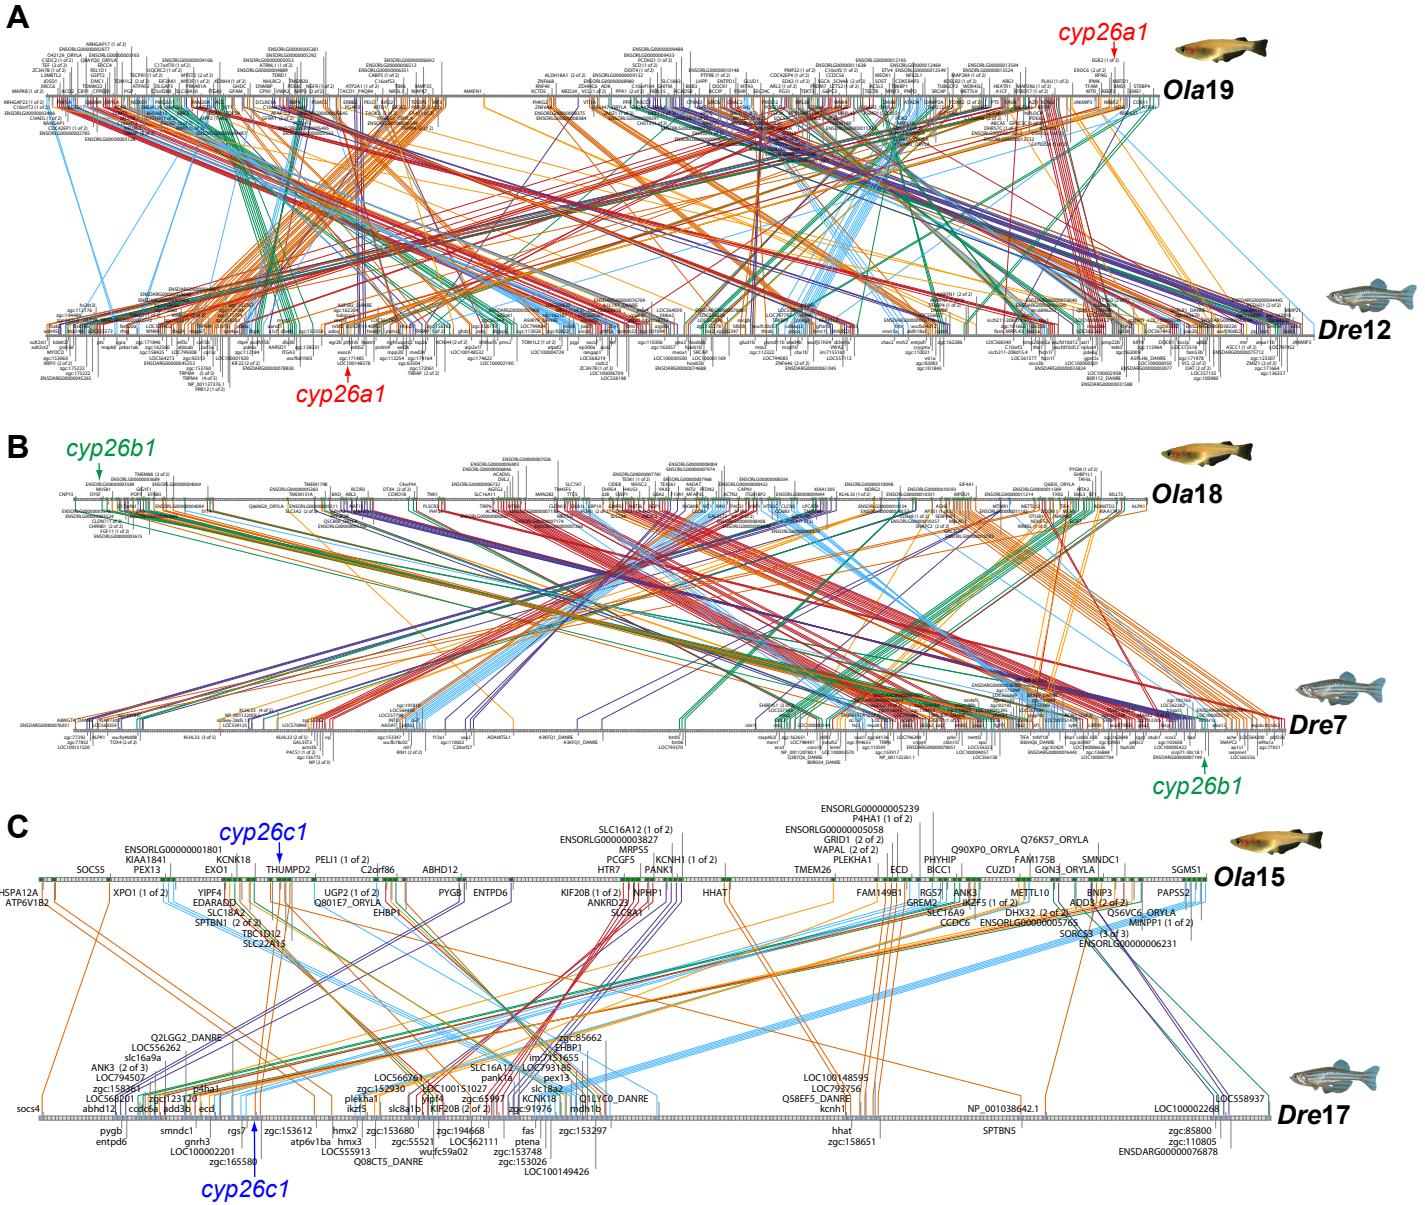

Supplement: pone.0073951.s001.pdf [file pone.0073951.s001.pdf]
