# Supplementary material for: Retinoic Acid Metabolic Genes, Meiosis, and Gonadal Sex Differentiation in Zebrafish
Source: PubMed Central journal article supplement (PMC3769385; doi:10.1371/journal.pone.0073951), 2013-09-10

**Additional Figure S2.** Comparative genomic analysis of synteny conservation between mouse and medaka supports conclusions from comparison of zebrafish and mouse (Fig. 2), ruling out the possibility of reciprocal gene loss in different lineages, and supports the notion that teleost *cyp26a1* and tetrapod *cyp26b1* are not orthologs. B: *cyp26b1* in *Mmu6* and *Ola18*; B: *Cyp26a1* in *Mmu19* and *Ola19*; and *Cyp26c1* in *Mmu19* and *Ola15*. Large fonts label *cyp26* orthologs and names of gene neighbors are legible in the high-resolution pdf electronic file.

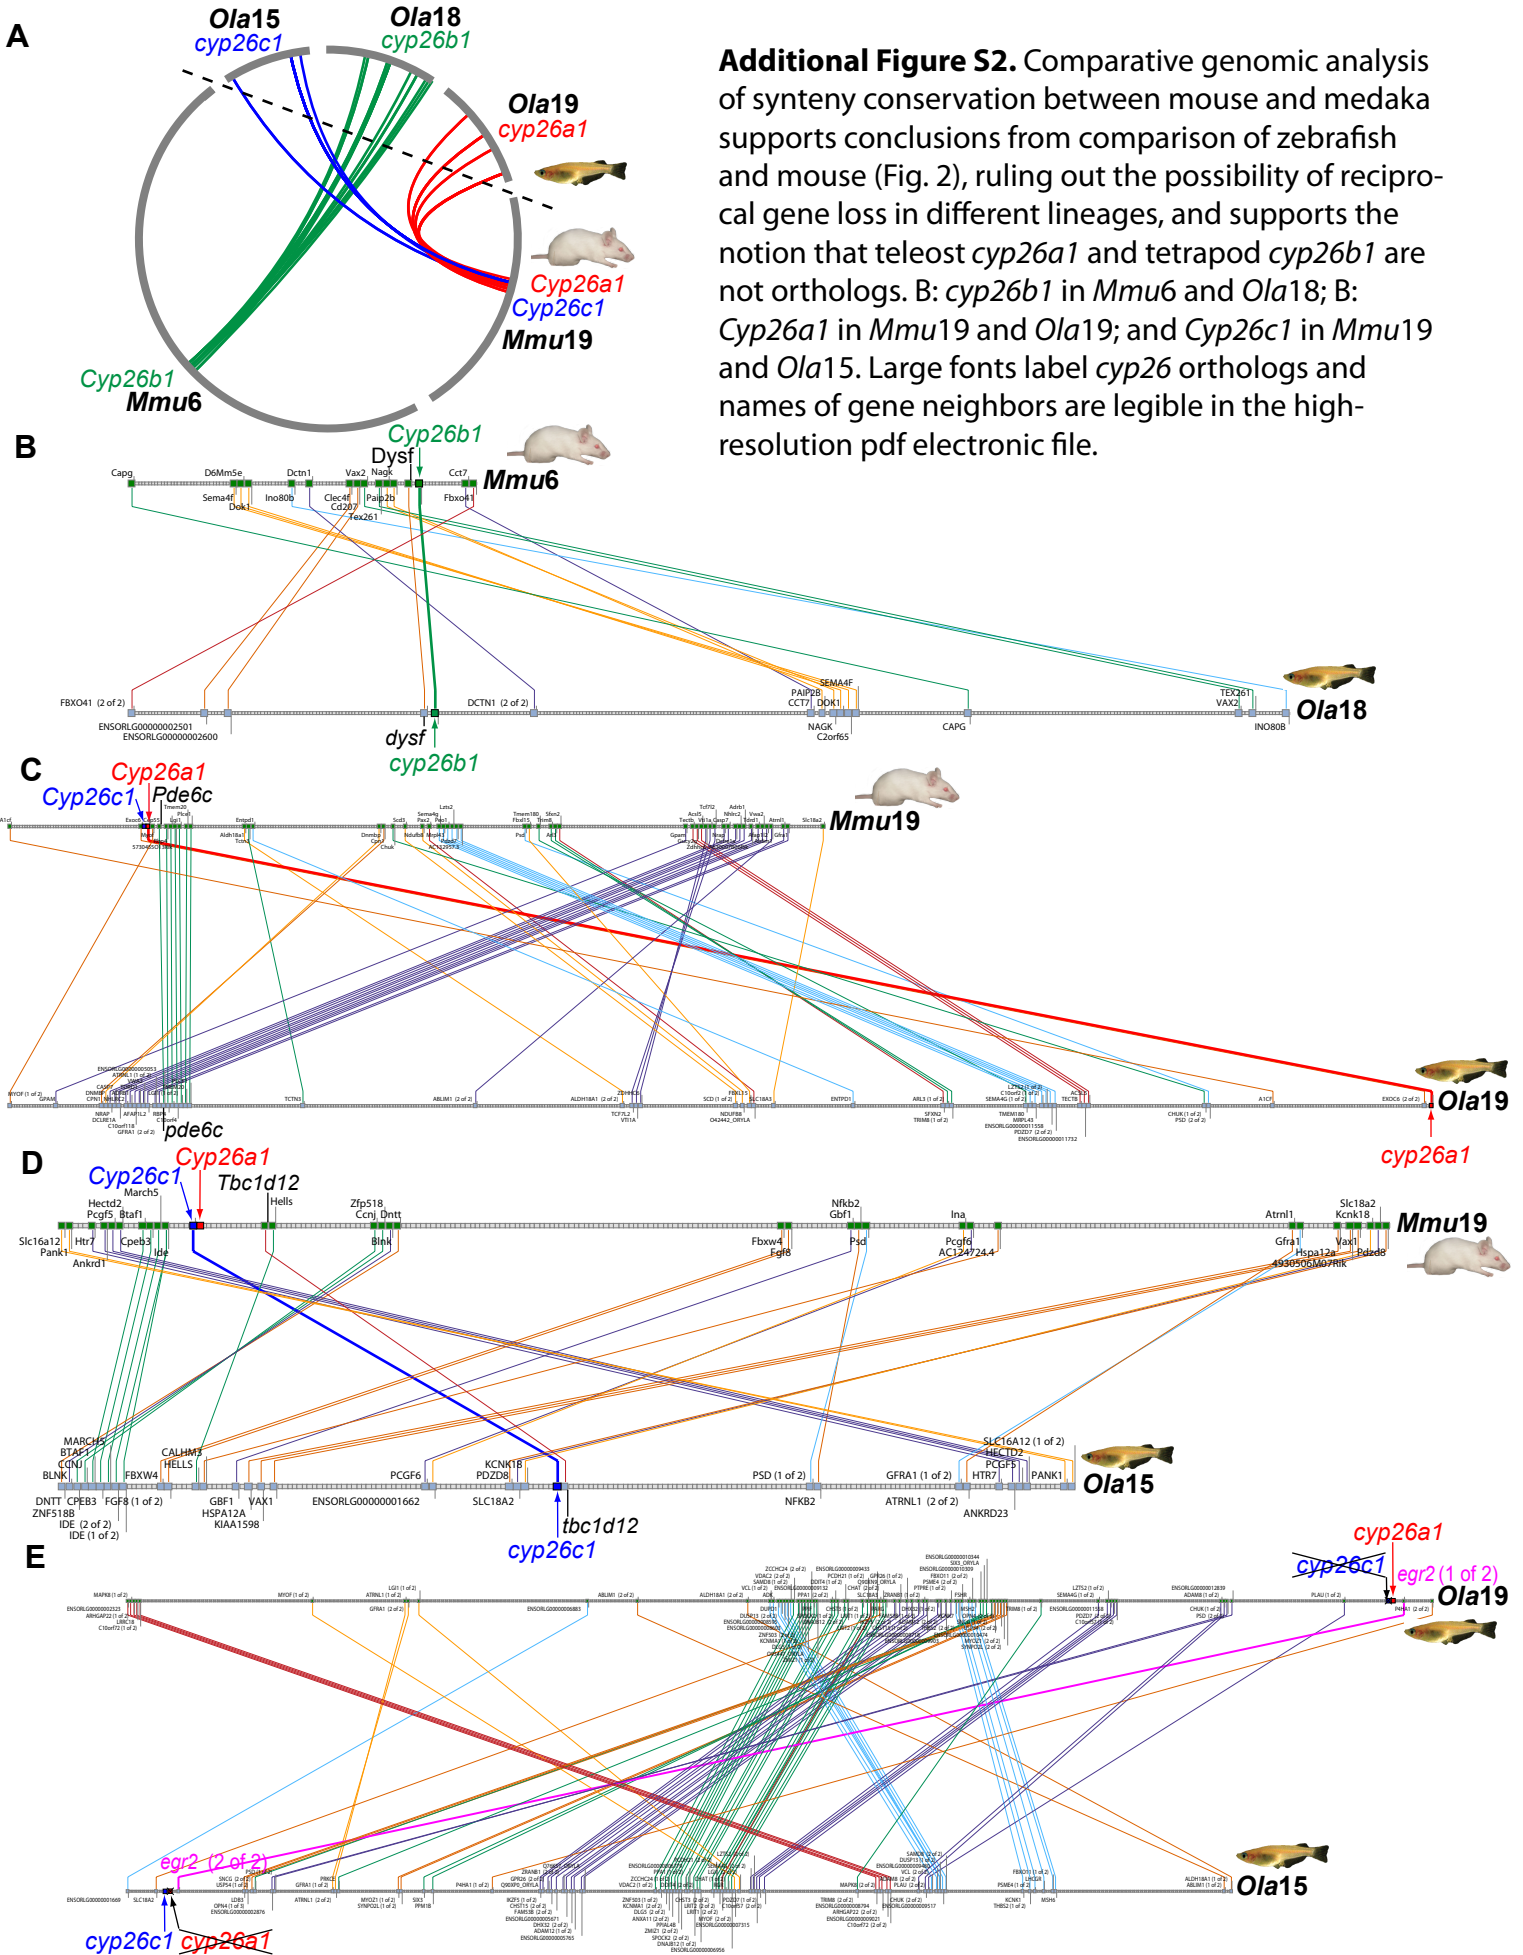

Supplement: pone.0073951.s002.pdf [file pone.0073951.s002.pdf]
